# Supplementary material for: New class of potent catalysts of O2˙−dismutation. Mn(iii) ortho-methoxyethylpyridyl- and di-ortho-methoxyethylimidazolylporphyrins
Source: Royal Society of Chemistry journal article supplement (doi:10.1039/b400818a), 2004-01-01
Supplement: b400818a.pdf [file b400818a.pdf]

Supplemental Material

**NEW CLASS OF POTENT CATALYSTS OF O<sub>2</sub><sup>-</sup> DISMUTATION.  
Mn(III) *ORTHO*-METHOXYETHYLPYRIDYL- AND DI-*ORTHO*-  
METHOXYETHYLIMIDAZOLYLPORPHYRINS**

by

Ines Batinic-Haberle,<sup>1\*</sup> Ivan Spasojevic,<sup>2</sup> Robert D. Stevens,<sup>3</sup> Peter Hambright,<sup>4</sup> Pedatsur Neta,<sup>5</sup> Ayako Okado-Matsumoto<sup>6</sup> and Irwin Fridovich<sup>6</sup>

*Departments of <sup>1</sup>Radiation Oncology, <sup>2</sup>Medicine, <sup>3</sup>Pediatrics, and <sup>6</sup>Biochemistry Duke University Medical Center, Durham, NC, 27710.*

<sup>4</sup>*Department of Chemistry, Howard University, Washington, D.C. 2005.*

<sup>5</sup>*Physical and Chemical Properties Division, National Institute of Standards and Technology, Gaithersburg, Maryland 20899.*

**Figure 1**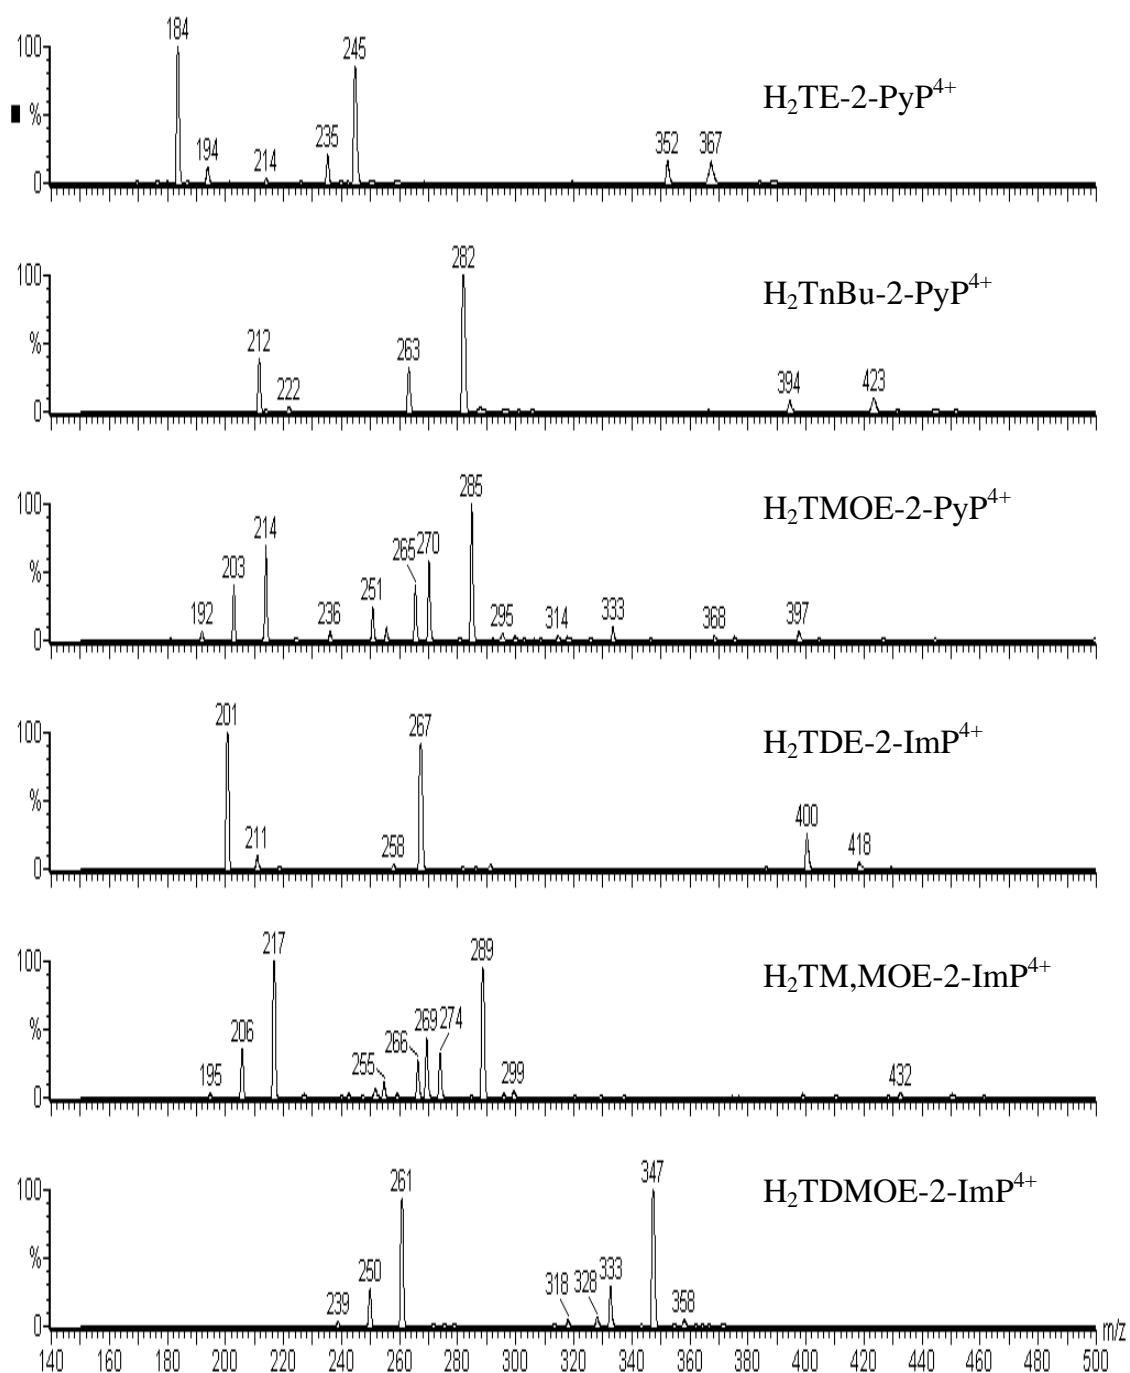

**Figure 1.** The ESMS spectra of metal-free porphyrins. ESMS measurements were performed on a Micromass Quattro LC triple quadrupole mass spectrometer equipped with a pneumatically assisted electrostatic ion source operating at atmospheric pressure as previously described.<sup>7,20</sup> Typically, metal-free porphyrins or their Mn(III) complexes were introduced by loop injection into a stream of 50% aqueous acetonitrile flowing at 8  $\mu\text{L}/\text{min}$ . Mass spectra were acquired in continuum mode, scanning from 100-500  $m/z$  in 5 s, with cone voltages of 20 V. The mass scale was calibrated using polyethylene glycol.

**Figure 2**

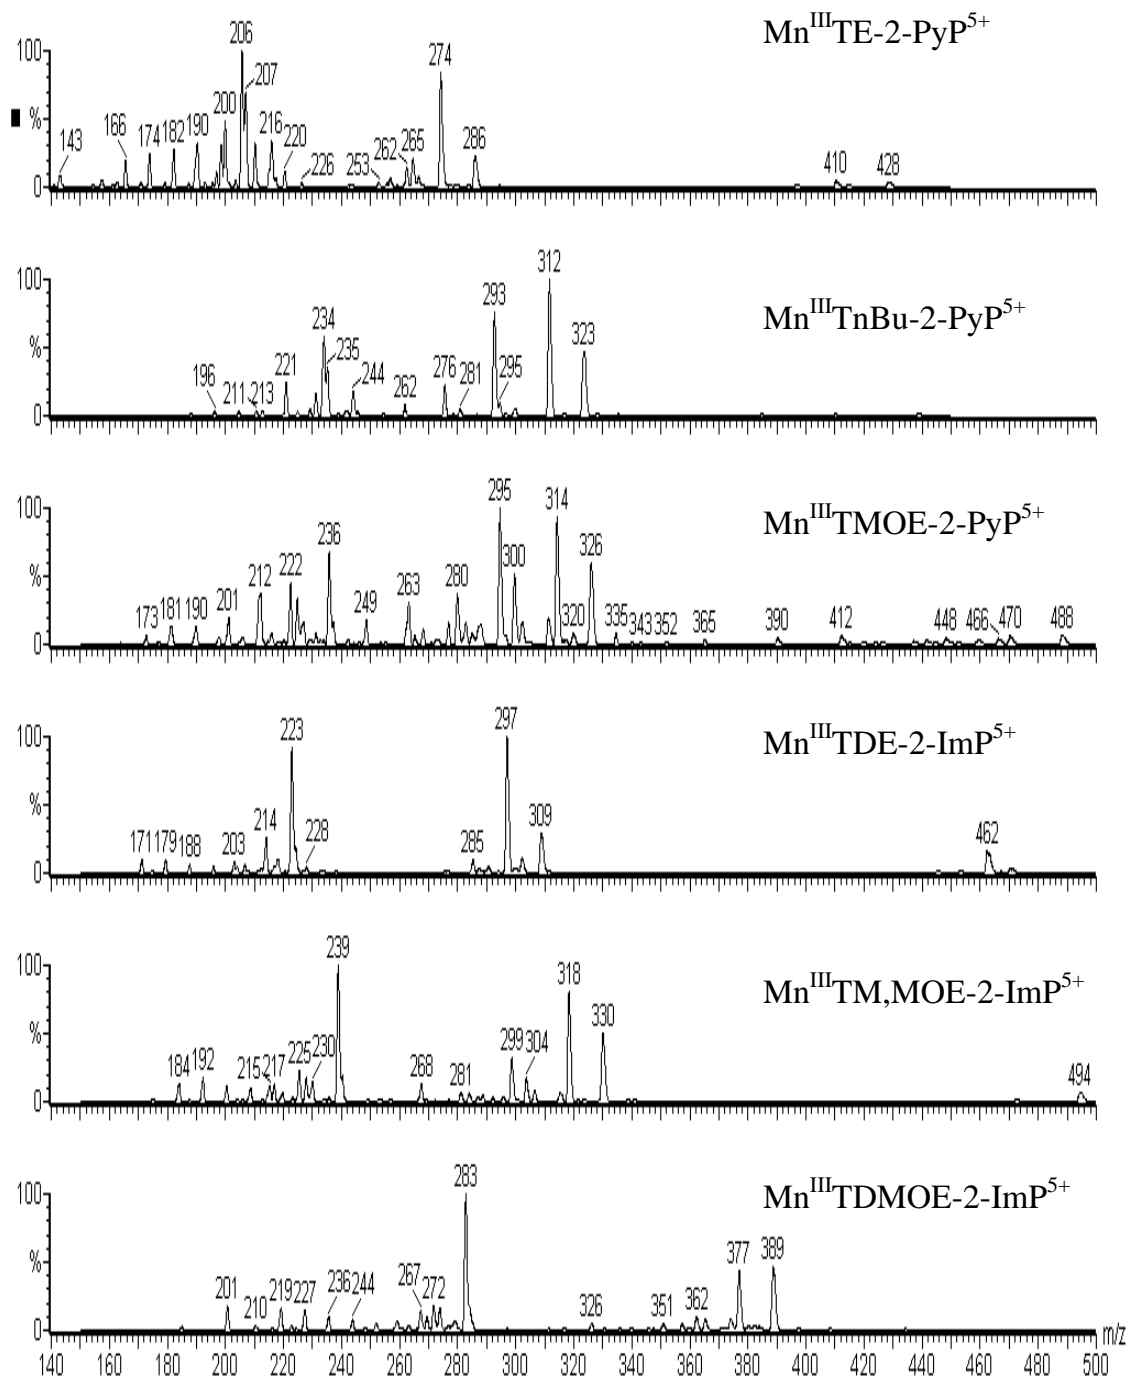

**Figure 2.** The ESMS spectra of Mn(III) porphyrins. All conditions are the same as with metal-free porphyrins (Figure 1).

**Table 1.** ESMS of methoxyethylporphyrins and their alkyl analogues.<sup>a</sup>

| Porphyrin                                                                                         | m/z            |                  |                  |                  |                  |                  |
|---------------------------------------------------------------------------------------------------|----------------|------------------|------------------|------------------|------------------|------------------|
|                                                                                                   | E <sup>b</sup> | nBu <sup>b</sup> | MOE              | DE               | M,MOE            | DMO              |
| H <sub>2</sub> P <sup>4+</sup> /4                                                                 | 184            | 212              | 214              | 201              | 217              | 261              |
| H <sub>2</sub> P <sup>4+</sup> +AN/4                                                              | 194            | 222              | 224              | 211              | 227              |                  |
| H <sub>2</sub> P <sup>4+</sup> -H <sup>+</sup> /3                                                 | 245            | 282              | 285              | 267              | 289              | 347              |
| H <sub>2</sub> P <sup>4+</sup> -H <sup>+</sup> +AN/3                                              | 258            |                  |                  |                  |                  |                  |
| H <sub>2</sub> P <sup>4+</sup> -a <sup>+</sup> -H <sup>+</sup> +CH <sub>3</sub> <sup>+</sup> /3   |                |                  | 270              |                  | 274              | 333              |
| H <sub>2</sub> P <sup>4+</sup> -a <sup>+</sup> /3                                                 | 235            | 263              | 265              | 258              | 269              | 328              |
| H <sub>2</sub> P <sup>4+</sup> -a <sup>+</sup> -H <sup>+</sup> /2                                 | 352            | 394              | 397              | 386 <sup>c</sup> | 403 <sup>c</sup> | 491 <sup>c</sup> |
| H <sub>2</sub> P <sup>4+</sup> -2a <sup>+</sup> /2                                                |                | 366 <sup>c</sup> | 368              | 372 <sup>c</sup> | 374 <sup>c</sup> | 462 <sup>c</sup> |
| H <sub>2</sub> P <sup>4+</sup> -2a <sup>+</sup> +H <sup>+</sup> /3                                |                |                  |                  | 249 <sup>c</sup> |                  |                  |
| H <sub>2</sub> P <sup>4+</sup> -a <sup>+</sup> -a-2H <sup>+</sup>                                 |                |                  |                  | 743 <sup>c</sup> |                  |                  |
| H <sub>2</sub> P <sup>4+</sup> -3a <sup>+</sup>                                                   |                |                  | 677              |                  |                  |                  |
| H <sub>2</sub> P <sup>4+</sup> -3a <sup>+</sup> +H <sup>+</sup> /2                                |                |                  |                  | 239 <sup>c</sup> |                  |                  |
| H <sub>2</sub> P <sup>4+</sup> -a <sup>+</sup> +CH <sub>3</sub> <sup>+</sup> /4                   |                |                  |                  |                  | 206              | 250              |
| H <sub>2</sub> P <sup>4+</sup> -2a <sup>+</sup> +CH <sub>3</sub> <sup>+</sup> /3                  |                |                  | 251 <sup>c</sup> |                  | 203              | 255              |
| H <sub>2</sub> P <sup>4+</sup> -2a <sup>+</sup> +2CH <sub>3</sub> <sup>+</sup> /4                 |                |                  | 192              |                  |                  | 313              |
| H <sub>2</sub> P <sup>4+</sup> -3a <sup>+</sup> +CH <sub>3</sub> <sup>+</sup> /2                  |                |                  | 346 <sup>c</sup> |                  |                  | 195              |
| H <sub>2</sub> P <sup>4+</sup> -3a <sup>+</sup> +2CH <sub>3</sub> <sup>+</sup> /3                 |                |                  | 236              |                  |                  | 352 <sup>c</sup> |
| H <sub>2</sub> P <sup>4+</sup> -3a <sup>+</sup> +2CH <sub>3</sub> <sup>+</sup> -H <sup>+</sup> /2 |                |                  | 324 <sup>c</sup> |                  |                  |                  |
| H <sub>2</sub> P <sup>4+</sup> -4a <sup>+</sup> +CH <sub>3</sub> <sup>+</sup>                     |                |                  | 633 <sup>c</sup> |                  |                  |                  |
| H <sub>2</sub> P <sup>4+</sup> -2H <sup>+</sup> /2                                                | 367            | 423              | 426              | 400              | 432              | 520 <sup>c</sup> |
| H <sub>2</sub> P <sup>4+</sup> -H <sup>+</sup> +Cl <sup>-</sup> /2                                |                |                  |                  | 418              | 450              |                  |

<sup>a</sup>~0.5mM solutions of porphyrins in 1:1=acetonitrile:H<sub>2</sub>O, 20 V cone voltage. AN is acetonitrile, a is either alkyl or methoxyethyl group. <sup>b</sup>Ref. 7. <sup>c</sup>30 V cone voltage. The fission of <sup>•</sup>CH<sub>2</sub>-O-CH<sub>3</sub> radical from methoxyethyl group is noted for simplicity as the loss of methoxyethyl (a<sup>+</sup>) and the gain of CH<sub>3</sub><sup>+</sup>.

**Table 2.** ESMS of Mn(III) methoxyethylporphyrins, and their alkyl analogues.<sup>a</sup>

| Porphyrins                                                                                           | E <sup>b</sup> | nBu <sup>b</sup> | m/z              |                  |                  |      |
|------------------------------------------------------------------------------------------------------|----------------|------------------|------------------|------------------|------------------|------|
|                                                                                                      |                |                  | MOE              | DE               | M,MOE            | DMOE |
| Mn <sup>III</sup> P <sup>5+</sup> /5                                                                 | 157            |                  | 181              | 171              | 184              | 219  |
| Mn <sup>III</sup> P <sup>5+</sup> +AN/5                                                              | 166            | 188              | 190              | 179              | 192              | 227  |
| Mn <sup>III</sup> P <sup>5+</sup> +2AN/5                                                             | 174            | 196              | 198              | 187              | 201              | 236  |
| Mn <sup>III</sup> P <sup>5+</sup> +3AN/5                                                             | 182            | 205              | 206              | 195              | 209              | 244  |
| Mn <sup>III</sup> P <sup>5+</sup> +4AN/5                                                             | 190            | 213              | 214              | 204              |                  | 252  |
| Mn <sup>III</sup> P <sup>5+</sup> +5AN/5                                                             |                |                  |                  |                  |                  | 260  |
| Mn <sup>III</sup> P <sup>5+</sup> +Cl <sup>-</sup> /4                                                | 206            | 234              | 236              | 223              | 239              | 283  |
| Mn <sup>III</sup> P <sup>5+</sup> +Cl <sup>-</sup> +AN/4                                             | 216            |                  |                  |                  |                  |      |
| Mn <sup>III</sup> P <sup>5+</sup> +2Cl <sup>-</sup> /3                                               | 286            | 323              | 326              | 309              | 330              | 389  |
| Mn <sup>III</sup> P <sup>5+</sup> -a <sup>+</sup> +Cl <sup>-</sup> /3                                | 265            | 293              | 295              |                  |                  | 357  |
| Mn <sup>III</sup> P <sup>5+</sup> -a <sup>+</sup> /4                                                 |                |                  | 212              | 207              | 215              | 259  |
| Mn <sup>III</sup> P <sup>5+</sup> -a <sup>+</sup> +AN/4                                              | 200            | 221              |                  |                  |                  | 269  |
| Mn <sup>III</sup> P <sup>5+</sup> -2a <sup>+</sup> /3                                                | 243            | 262              | 263              | 266 <sup>c</sup> | 268              |      |
| Mn <sup>III</sup> P <sup>5+</sup> -2a <sup>+</sup> +AN/3                                             |                | 276              | 277              |                  |                  |      |
| Mn <sup>III</sup> P <sup>5+</sup> -3a <sup>+</sup> /2                                                |                |                  | 365              |                  | 371 <sup>b</sup> |      |
| Mn <sup>III</sup> P <sup>5+</sup> -3a <sup>+</sup> +Cl <sup>-</sup>                                  |                |                  | 765              |                  |                  |      |
| Mn <sup>III</sup> P <sup>5+</sup> -4a <sup>+</sup>                                                   |                |                  | 671              |                  |                  |      |
| Mn <sup>III</sup> P <sup>5+</sup> -a <sup>+</sup> +CH <sub>3</sub> <sup>+</sup> +Cl <sup>-</sup> /4  |                |                  | 225              |                  |                  | 272  |
| Mn <sup>III</sup> P <sup>5+</sup> -2a <sup>+</sup> +CH <sub>3</sub> <sup>+</sup> +Cl <sup>-</sup> /3 |                |                  | 280              |                  |                  |      |
| Mn <sup>III</sup> P <sup>5+</sup> -4a <sup>+</sup> +CH <sub>3</sub> <sup>+</sup> /2                  |                |                  |                  |                  |                  |      |
| Mn <sup>III</sup> P <sup>5+</sup> -CH <sub>3</sub> <sup>+</sup> +H <sup>+</sup> /5                   |                |                  |                  |                  | 181 <sup>b</sup> |      |
| Mn <sup>III</sup> P <sup>5+</sup> -Mn <sup>3+</sup> +H <sup>+</sup> /3                               |                | 281              |                  |                  |                  |      |
| Mn <sup>III</sup> P <sup>5+</sup> -Mn <sup>3+</sup> +2H <sup>+</sup> /4                              |                |                  | 214              |                  | 217              |      |
| Mn <sup>II</sup> P <sup>4+</sup> /4                                                                  | 197            |                  | 227              | 214              |                  | 274  |
| Mn <sup>II</sup> P <sup>4+</sup> +AN/4                                                               | 207            | 235              |                  | 224              |                  |      |
| Mn <sup>II</sup> P <sup>4+</sup> +Cl <sup>-</sup> /3                                                 | 274            | 312              | 314              | 297              | 318              | 377  |
| Mn <sup>II</sup> P <sup>4+</sup> +2Cl <sup>-</sup> /2                                                | 428            |                  | 488              | 462              | 494              | 583  |
| Mn <sup>II</sup> P <sup>4+</sup> -a <sup>+</sup> /3                                                  | 253            | 281              | 283 <sup>c</sup> | 276 <sup>c</sup> | 287              |      |
| Mn <sup>II</sup> P <sup>4+</sup> -2a <sup>+</sup> /2                                                 |                |                  |                  |                  | 401 <sup>c</sup> |      |
| Mn <sup>II</sup> P <sup>4+</sup> -2a <sup>+</sup> +H <sup>+</sup> /3                                 |                |                  |                  |                  |                  | 326  |
| Mn <sup>II</sup> P <sup>4+</sup> -a <sup>+</sup> +CH <sub>3</sub> <sup>+</sup> +Cl <sup>-</sup> /3   |                |                  | 300              |                  | 304              | 362  |
| Mn <sup>II</sup> P <sup>4+</sup> -4a <sup>+</sup> +CH <sub>3</sub> <sup>+</sup>                      |                |                  | 687              |                  |                  |      |
| Mn <sup>II</sup> P <sup>4+</sup> -7a <sup>3+</sup>                                                   |                |                  |                  | 653 <sup>d</sup> |                  |      |
| Mn <sup>II</sup> P <sup>3+</sup> /3 or Mn <sup>I</sup> P <sup>3+</sup> /3                            |                | 295              | 303              | 285 <sup>c</sup> | 307              | 365  |

<sup>a</sup>~0.5mM solutions of porphyrins in 1:1=acetonitrile:H<sub>2</sub>O, 20 V cone voltage. AN is acetonitrile, a is either alkyl or methoxyethyl group. <sup>b</sup>Ref 7. <sup>c</sup>30 V cone voltage. <sup>d</sup>signal of very low intensity. The fission of ·CH<sub>2</sub>-O-CH<sub>3</sub> radical from methoxyethyl group is noted for simplicity as the loss of methoxyethyl (a<sup>+</sup>) and the gain of CH<sub>3</sub><sup>+</sup>.
